# Supplementary material for: High throughput nano-liter RT-qPCR to classify soil contamination using a soil arthropod
Source: BMC Mol Biol. 2011 Mar 1;12:11. doi: 10.1186/1471-2199-12-11 (PMC3060125; doi:10.1186/1471-2199-12-11)
Supplement: Additional file 4 — Details of the qPCR assays used in this study; primer sequences and efficiencies; associated GO terms [file 1471-2199-12-11-S4.XLS]

## Sheet: Details QPCR assays (2)
Details qPCR assays used for cadmium and phenanthrene
#	SSH	Collembase ID	Gene	Primer #		Forward primer sequences (5’ → 3’)	Reverse primer sequences (5’ → 3’)	efficiency	CC Ontology	BP Ontology	MF Ontology
				F	R
1	Cd	Fcc00008	unknown function	3	4	CTCCCCTAAGTCCAAGTTGAATTG	ACAACAACGGTGCGTGATGA	2.0277	not available	not available	not available
2	Cd	Fcc00101	BCS1	7	8	TTTAGAGGTCTGCTTAACGCGC	TAGGGCAGGATCCAATCGTTC	1.8646	GO:0005739:mitochondrion GO:0005743:mitochondrial inner membrane GO:0005750:mitochondrial respiratory chain complexIII GO:0016020:membrane GO:0016021:integral to membrane	GO:0006461:proteincomplexassembly GO:0007005:mitochondrionorganization GO:0007605:sensoryperceptionofsound GO:0009060:aerobicrespiration GO:0015980:energyderivationbyoxidationoforganiccompounds GO:0051131:chaperone-mediatedproteincomplexassembly	GO:0000166:nucleotide binding GO:0005524:ATPbinding GO:0017111:nucleoside-triphosphataseactivity
3	Cd	Fcc00344	retinol dehydrogenase 11	11	12	TCTTACCCGAGATTGAGAAAGCC	TAAGTTGACCCCAGTTGTGCG	1.8734	GO:0005576:extracellular region GO:0005622:intracellular GO:0005783:endoplasmic reticulum GO:0005789:endoplasmic reticulum membrane GO:0016020:membrane GO:0016021:integral to membrane	GO:0007601:visual perception GO:0008152:metabolic process GO:0042572:retinol metabolic process GO:0045494:photoreceptorcell maintenance GO:0050896:response to stimulus GO:0055114:oxidation reduction	GO:0003824:catalytic activity GO:0004745:retinol dehydrogenase activity GO:0005488:binding GO:0016491:oxidoreductase activity
4	Cd	Fcc00583	inflammatory response protein 6; viperin;	15	16	AAGCGCTAATTGAGACGGATTG	CACTGAAGAGCAGGATCATCCC	2.0436	GO:0005783:endoplasmic reticulum GO:0005789:endoplasmic reticulum membrane GO:0005794:Golgi apparatus GO:0016020:membrane	GO:0001503:ossification GO:0009615:response to virus GO:0030278:regulation of ossification GO:0051607:defense response to virus	GO:0003674:molecular_function GO:0003824:catalytic activity GO:0005506:iron ion binding GO:0046872:metal ion binding GO:0051536:iron-sulfurcluster binding
5	Cd	Fcc01017	endo-glucanase precursor	17	18	TGGAAGACCTACTAGCTTGGTTGG	CGGCTCTGTAATGTTCCACGA	1.9893	not available	not available	not available
6	Cd	Fcc01428	16S ribosomal RNA gene, no sign hits	21	22	GAGGACACATTGTCGTCAGTGC	AGCTAACTTTCGTCCCATCCG	1.8713	not available	not available	not available
7	Cd	Fcc01574	glycine receptor, alpha 1	23	24	CACCCCTACAACTGTCAAGGTCA	GAAATAGAAGTTGCACCCTGAAGG	1.8906	GO:0005622: intracellular GO:0005624: membrane fraction GO:0005783: endoplasmic reticulum GO:0005886: plasma membrane GO:0005887: integral to plasma membrane GO:0009897: external side of plasma membrane GO:0016020: membrane GO:0016021: integ	GO:0001508: regulation of action potentialGO:0001964: startle responseGO:0002087: regulation of respiratory gaseous exchange by neurological processGO:0006810: transportGO:0006811: ion transportGO:0006820: anion transportGO:0006821: chloride transportGO:0	GO:0004872: receptor activityGO:0004890: GABA-A receptor activityGO:0005216: ion channel activityGO:0005230: extracellular ligand-gated ion channel activityGO:0005254: chloride channel activityGO:0005515: protein bindingGO:0016594: glycine bindingGO:00169
8	Cd	Fcc01821contig1	Isopenicillin N synthetase	25	26	GCGACATGCTTGGTCAATTTC	CATCTGCATCCAACCCACTTG	1.9708	not available	GO:0009058: biosynthetic processGO:0017000: antibiotic biosynthetic processGO:0055114: oxidation reduction	GO:0005506: iron ion bindingGO:0016216: isopenicillin-N synthase activityGO:0016491: oxidoreductase activityGO:0031418: L-ascorbic acid bindingGO:0046872: metal ion binding
9	Cd	Fcc01821contig2	Isopenicillin N synthetase	27	28	TTCGCTACCCGTATTTGGAGG	GTATGGCTGATACAGCACCGTG	1.9	not available	GO:0009058: biosynthetic processGO:0017000: antibiotic biosynthetic processGO:0055114: oxidation reduction	GO:0005506: iron ion bindingGO:0016216: isopenicillin-N synthase activityGO:0016491: oxidoreductase activityGO:0031418: L-ascorbic acid bindingGO:0046872: metal ion binding
10	Cd	Fcc01910	whey acidic protein	29	30	CGTGTACGACCCCTCTAGAAATTG	TGATACACTCCTTCCCACAGCC	1.9888	not available	not available	not available
11	Cd	Fcc02275	No Significant Hit			GAAAATTGGCTCTCAGGCAGC	GACCATGCCAGCCAAATTTCT	1.7899	not available	not available	not available
12	Cd	Fcc03202	No Significant Hit	35	36	ATCGCAGCGGGAAATATACTTG	ATTCACTGACAGCATTCCACATTC	1.9	not available	not available	not available
13	Cd	Fcc04239	unknown function	39	40	TGCACTTTTGTGGCTGGAAAG	CACACGTCCATCCTTAAGCTGAG	2.2978	not available	not available	not available
14	Cd	Fcc04580	metalloproteinase; nephrosin; astacin 4	41	42	GTTTCGATTCTTCTACTGCTTGGC	AATTCGTAGGTTTGCTTGGTGG	2.2588	GO:0005576: extracellular regionGO:0005615: extracellular spaceGO:0005624: membrane fractionGO:0005886: plasma membraneGO:0005887: integral to plasma membraneGO:0016020: membraneGO:0016021: integral to membrane	GO:0006508: proteolysisGO:0007586: digestion	GO:0004222: metalloendopeptidase activityGO:0008233: peptidase activityGO:0008237: metallopeptidase activityGO:0008270: zinc ion bindingGO:0016787: hydrolase activityGO:0046872: metal ion binding
15	Cd	Fcc04660	No Significant Hit	43	44	GAGAATTCCCGCGATGAAGAG	GGCAGGGTTTTTGATGGATATG	2.0361	not available	not available	not available
16	Cd	Fcc00074	Cephalosporin hydroxylase	47	48	ACTCACGCCCTTGTCTGGTATC	CCAACATTCTTCAGCTGCAGC	2.0791	not available	not available	not available
17	Cd	Fcc00343	haloacid dehalogenase-like hydrolase	49	50	TATTTAATCCGCGACATGGGTC	AATAATGCCGTCCTGGTGTAGC	2.0114	not available	not available	not available
18	Cd	Fcc00966	Short-chain dehydrogenase/reductase 9	73	74	AAATGGACTTGGCCCAGACTG	TAAGCAATTTGTGGGCGAGC	2.091	GO:0005575: cellular_componentGO:0005576: extracellular region	GO:0008150: biological_processGO:0008152: metabolic processGO:0055114: oxidation reduction	GO:0003674: molecular_functionGO:0003824: catalytic activityGO:0005488: bindingGO:0016491: oxidoreductase activity
19	Cd	Fcc00343-2	Haloacid dehalogenase like hydrolase	75	76	TATTTAATCCGCGACATGGGTC	AATAATGCCGTCCTGGTGTAGC	2.0339	not available	not available	not available
20	Cd	Fcc00002	Catalase	85	86	CCGCTCACAATTCCACACAAC	CTTTATGCTTCCGGCTCGTATG	1.9	not available	not available	not available
21	Cd	Fcc00343-1	Haloacid dehalogenase like hydrolase	87	88	AAATTTTGTGGCTGGACGGA	TCTTACGAGAACAATTCCCCGTT	1.9	not available	not available	not available
22	Cd	Fcc00086	LamininA	89	90	GAGTGGAGCAGGACGCTGTAAT	GAACTTGGATTTAACTCCGTCGC	1.9801	GO:0005576: extracellular regionGO:0005578: proteinaceous extracellular matrixGO:0005604: basement membraneGO:0005605: basal laminaGO:0005606: laminin-1 complexGO:0005614: interstitial matrixGO:0005615: extracellular spaceGO:0009986: cell surfaceGO:003101	GO:0001958: endochondral ossificationGO:0007009: plasma membrane organizationGO:0007155: cell adhesionGO:0007268: synaptic transmissionGO:0007411: axon guidanceGO:0007420: brain developmentGO:0007498: mesoderm developmentGO:0007507: heart developmentGO:00	GO:0005102: receptor bindingGO:0005515: protein bindingGO:0005539: glycosaminoglycan bindingGO:0030548: acetylcholine receptor regulator activity
23	Cd	Fcc03748	unknown function (putative MT?)	91	92	TCTGTTGTTGCTGGTGGGTGT	CACATCCTTCGACTTTAGCAGGG	2.0002	not available	not available	not available
24	Cd	Fcc00170	alpha-aminoadipyl-cysteinyl-valine synthetase	767	768	GGAGGACAGTATTTCAGCCGTG	CAATGGTTCGTGGTATCCGAA	1.9		GO:0008152: metabolic processGO:0009058: biosynthetic processGO:0017000: antibiotic biosynthetic process	GO:0000036: acyl carrier activityGO:0003824: catalytic activityGO:0016788: hydrolase activity, acting on ester bondsGO:0016874: ligase activityGO:0031177: phosphopantetheine bindingGO:0048037: cofactor bindingGO:0050564: N-(5-amino-5-carboxypentanoyl)-L-c
25	Phe	Fcc05839	alcohol dehydrogenase (acceptor)	1	2	GCGCGTAATCGATGCTAGTGT	GCCCAGGCCTCTTTAATGAAA	2.1767	GO:0005576: extracellular regionGO:0005739: mitochondrionGO:0005743: mitochondrial inner membrane	GO:0006006: glucose metabolic processGO:0006066: cellular alcohol metabolic processGO:0008364: pupal chitin-based cuticle developmentGO:0019285: glycine betaine biosynthetic process from cholineGO:0046693: sperm storageGO:0055114: oxidation reduction	GO:0004344: glucose dehydrogenase activityGO:0008430: selenium bindingGO:0008812: choline dehydrogenase activityGO:0016491: oxidoreductase activityGO:0016614: oxidoreductase activity, acting on CH-OH group of donorsGO:0050660: FAD binding
26	Phe	Fcc05181	immunoglobulin-like, sid-1-like protein2	3	4	CGTGACTTCAAACAAGCGTCC	TTTCCAACCATCCACTTCGTG	2.2785	not available	not available	not available
27	Phe	Fcc04834	crossveinless-2; Bmper protein	5	6	AAGAGGTGGCCCAGTAAGTCATC	GGTTCAGGACCTTTCACTTCTTCTC	1.9848	GO:0005576: extracellular regionGO:0005578: proteinaceous extracellular matrixGO:0005737: cytoplasmGO:0005783: endoplasmic reticulumGO:0005886: plasma membraneGO:0016020: membraneGO:0031012: extracellular matrixGO:0033093: Weibel-Palade body	GO:0007155: cell adhesionGO:0007339: binding of sperm to zona pellucidaGO:0007596: blood coagulationGO:0007599: hemostasisGO:0030168: platelet activationGO:0030514: negative regulation of BMP signaling pathwayGO:0031589: cell-substrate adhesionGO:0051260:	GO:0001948: glycoprotein bindingGO:0002020: protease bindingGO:0005178: integrin bindingGO:0005179: hormone activityGO:0005198: structural molecule activityGO:0005509: calcium ion bindingGO:0005515: protein bindingGO:0005518: collagen bindingGO:0019865: i
28	Phe	Fcc03839	LMBR1 domain containing 2	7	8	AAAAAGCGCAGACAGCCAGA	CTCCCAACATCCAGTCCTTTCA	2.0005	GO:0005575: cellular_componentGO:0016020: membraneGO:0016021: integral to membrane	not available	not available
29	Phe	Fcc01609	heat shock protein Hsp70g; HSP68	9	10	CAACTGGAGAACTACGTCTTTGGAG	GGCGAGAACTTGTTGCTTATCAG	1.8008	GO:0005575: cellular_componentGO:0005634: nucleus	GO:0006950: response to stressGO:0006986: response to unfolded proteinGO:0008340: determination of adult life spanGO:0009408: response to heatGO:0035080: heat shock-mediated polytene chromosome puffing	GO:0000166: nucleotide bindingGO:0005515: protein bindingGO:0005524: ATP binding
30	Phe	Fcc06002	ABC transporter; MOAT-D	11	12	TTGTCGGGAGGTCAGAAGTAGC	CACGGCACTCAATGGATCATC	1.9209	GO:0005624: membrane fractionGO:0005887: integral to plasma membraneGO:0016020: membraneGO:0016021: integral to membraneGO:0016324: apical plasma membraneGO:0046581: intercellular canaliculus	GO:0006810: transportGO:0015722: canalicular bile acid transportGO:0042493: response to drugGO:0055114: oxidation reduction	GO:0000166: nucleotide bindingGO:0005215: transporter activityGO:0005515: protein bindingGO:0005524: ATP bindingGO:0008514: organic anion transmembrane transporter activityGO:0016491: oxidoreductase activityGO:0016887: ATPase activityGO:0017111: nucleosid
31	Phe	Fcc03172	putative deoxynucleoside kinase	13	14	GTCCAACGTGGTCGATTTGAA	CACGGTAAGTTGTGCTTCTCATTG	1.8887	GO:0005575: cellular_componentGO:0005634: nucleusGO:0005739: mitochondrionGO:0005743: mitochondrial inner membraneGO:0005829: cytosol	GO:0006139: nucleobase, nucleoside, nucleotide and nucleic acid metabolic processGO:0006165: nucleoside diphosphate phosphorylationGO:0006220: pyrimidine nucleotide metabolic processGO:0006260: DNA replicationGO:0008617: guanosine metabolic processGO:0017	GO:0000166: nucleotide bindingGO:0000287: magnesium ion bindingGO:0004137: deoxycytidine kinase activityGO:0004138: deoxyguanosine kinase activityGO:0004797: thymidine kinase activityGO:0005515: protein bindingGO:0005524: ATP bindingGO:0008144: drug bindi
32	Phe	Fcc03067	Shprh protein	15	16	CAGGAGCTGTCTGTTGAACCAAT	ACCTTTCGACCCAGAAGCAAG	1.9748	GO:0000786: nucleosomeGO:0005634: nucleusGO:0005737: cytoplasmGO:0005739: mitochondrionGO:0005829: cytosolGO:0009941: chloroplast envelope	GO:0000082: G1/S transition of mitotic cell cycleGO:0006281: DNA repairGO:0006289: nucleotide-excision repairGO:0006334: nucleosome assemblyGO:0006511: ubiquitin-dependent protein catabolic processGO:0006950: response to stressGO:0006974: response to DNA	GO:0000166: nucleotide bindingGO:0003676: nucleic acid bindingGO:0003677: DNA bindingGO:0004386: helicase activityGO:0005515: protein bindingGO:0005524: ATP bindingGO:0008270: zinc ion bindingGO:0016787: hydrolase activityGO:0016818: hydrolase activity, a
33	Phe	Fcc04344	laminin, beta 2; laminin S	17	18	TGCATTGAAACTCGTTCCCC	GGCTTGTGACTGCGACTATCATT	1.9706	not available	not available	not available
34	Phe	Fcc02471	omega class glutathione S-transferase	19	20	TGCGACTAACACAGATCTTTGAGC	CCTCGCTAAAGGGTCACAATGT	1.9682	GO:0005737: cytoplasm	GO:0002009: morphogenesis of an epitheliumGO:0008150: biological_processGO:0008152: metabolic processGO:0009792: embryonic development ending in birth or egg hatchingGO:0018991: ovipositionGO:0019853: L-ascorbic acid biosynthetic processGO:0040010: positi	GO:0004364: glutathione transferase activityGO:0016656: monodehydroascorbate reductase (NADH) activityGO:0016740: transferase activity
35	Phe	Fcc05124	CCCTC-binding factor-like protein	21	22	TGCATCACTACCTTGCCGAAG	CTGCGTAGTTTTCCCATGCTG	2.0299	not available	not available	not available
36	Phe	Fcc04316	phosphoserine aminotransferase	23	24	GCAGTGCCATTAAACCTTATGAGC	GTTGCCTTTCCGTATTTGGTTG	2.0622	GO:0005737: cytoplasm	GO:0006564: L-serine biosynthetic processGO:0008152: metabolic processGO:0008615: pyridoxine biosynthetic processGO:0008652: amino acid biosynthetic process	GO:0003824: catalytic activityGO:0004648: phosphoserine transaminase activityGO:0005515: protein bindingGO:0008483: transaminase activityGO:0016740: transferase activityGO:0030170: pyridoxal phosphate binding
37	Phe	Fcc06085	ABC-type multidrug transport system	25	26	TCCGTTCAATTGTTAGTAGAGGCTG	AACCAATACAAGGCAATCCACG	2.1205	GO:0016020: membraneGO:0016021: integral to membrane	GO:0006810: transport	GO:0000166: nucleotide bindingGO:0005215: transporter activityGO:0005524: ATP bindingGO:0016887: ATPase activityGO:0017111: nucleoside-triphosphatase activityGO:0042626: ATPase activity, coupled to transmembrane movement of substances
38	Phe	Fcc03183	scribbled	27	28	GCCGTTGGTCTTCCTAAACTTTC	CCCATTCACGCTTGACTCATC	2.0451	GO:0005576: extracellular regionGO:0005634: nucleusGO:0005730: nucleolusGO:0005737: cytoplasmGO:0005886: plasma membraneGO:0005912: adherens junctionGO:0005918: septate junctionGO:0005923: tight junctionGO:0005925: focal adhesionGO:0016020: membraneGO:001	GO:0000003: reproductionGO:0000902: cell morphogenesisGO:0001738: morphogenesis of a polarized epitheliumGO:0006605: protein targetingGO:0007155: cell adhesionGO:0007163: establishment or maintenance of cell polarityGO:0007275: multicellular organismal de	GO:0005179: hormone activityGO:0005515: protein binding
39	Phe	Fcc01177	ABC transporter ABCC1	51	52	CCAGCGTCAGTTGGTATGCTTAG	AAGGTCGTCAGTCGTTAGATCCAC	1.9609	GO:0005624: membrane fractionGO:0005887: integral to plasma membraneGO:0016020: membraneGO:0016021: integral to membrane	GO:0006810: transportGO:0015722: canalicular bile acid transportGO:0042493: response to drugGO:0055114: oxidation reduction	GO:0000166: nucleotide bindingGO:0005215: transporter activityGO:0005524: ATP bindingGO:0008514: organic anion transmembrane transporter activityGO:0016491: oxidoreductase activityGO:0016887: ATPase activityGO:0017111: nucleoside-triphosphatase activityGO
40	Phe	Fcc01609	HSP70; HSP68	53	54	CAACTGGAGAACTACGTCTTTGGAG	GGCGAGAACTTGTTGCTTATCAG	1.9711	GO:0005575: cellular_componentGO:0005634: nucleus	GO:0006950: response to stressGO:0006986: response to unfolded proteinGO:0008340: determination of adult life spanGO:0009408: response to heatGO:0035080: heat shock-mediated polytene chromosome puffing	GO:0000166: nucleotide bindingGO:0005515: protein bindingGO:0005524: ATP binding
41	Phe	Fcc00015, Fcc04217	CYP9/6	cyp1	cyp2	TTGATCACTTTTCGGACCGG	TCATGTCTTTCCACTCTTGTCCC	1.9	GO:0005789: endoplasmic reticulum membraneGO:0005792: microsomeGO:0016020: membrane GO:0005783: endoplasmic reticulum	GO:0031000: response to caffeineGO:0055114: oxidation reduction	GO:0004497: monooxygenase activityGO:0005506: iron ion bindingGO:0009055: electron carrier activityGO:0016491: oxidoreductase activityGO:0020037: heme bindingGO:0046872: metal ion bindingGO:0050381: unspecific monooxygenase activity, GO:0005515: protein b
42	Phe	Fcc00021	Moxd1 protein	cyp7	cyp8	CTTCAACTCGCTTCTGCATGC	GTTGTCGTAATCGATCCAGGGA	1.9	GO:0005575: cellular_componentGO:0005576: extracellular regionGO:0005783: endoplasmic reticulumGO:0005789: endoplasmic reticulum membraneGO:0016020: membraneGO:0016021: integral to membraneGO:0030054: cell junctionGO:0031410: cytoplasmic vesicleGO:0045202	GO:0006548: histidine catabolic processGO:0006584: catecholamine metabolic processGO:0006589: octopamine biosynthetic processGO:0007268: synaptic transmissionGO:0007613: memoryGO:0008150: biological_processGO:0008345: larval locomotory behaviorGO:0009987:	GO:0003674: molecular_functionGO:0003824: catalytic activityGO:0004497: monooxygenase activityGO:0004500: dopamine beta-monooxygenase activityGO:0005507: copper ion bindingGO:0005515: protein bindingGO:0016491: oxidoreductase activityGO:0016715: oxidoredu
43	Phe	Fcc00058, Fcc01786, Fcc00705, Fcc04911	CYP6N3v2	cyp15	cyp16	AGACGACACAGACTATGCCGCT	TCGTGCATACTGCAGAACTTCTTAA	1.9	GO:0005576: extracellular regionGO:0005624: membrane fractionGO:0005634: nucleusGO:0005737: cytoplasmGO:0005783: endoplasmic reticulumGO:0005789: endoplasmic reticulum membraneGO:0005792: microsomeGO:0005886: plasma membraneGO:0009986: cell surfaceGO:0016	GO:0001666: response to hypoxiaGO:0006508: proteolysisGO:0006955: immune responseGO:0033632: regulation of cell-cell adhesion mediated by integrinGO:0042110: T cell activationGO:0055114: oxidation reduction	GO:0004177: aminopeptidase activityGO:0004252: serine-type endopeptidase activityGO:0004497: monooxygenase activityGO:0005506: iron ion bindingGO:0005515: protein bindingGO:0008233: peptidase activityGO:0008236: serine-type peptidase activityGO:0008239: d
44	Phe	Fcc00390	CYP2P3 (fish)	cyp19	cyp20	CATTCCTTTACATGGCGAAATACC	CGATCATTTAAACATGGCTGTCTG	1.9	GO:0005783: endoplasmic reticulumGO:0005789: endoplasmic reticulum membraneGO:0005792: microsomeGO:0016020: membraneGO:0016021: integral to membrane	GO:0006631: fatty acid metabolic processGO:0006690: icosanoid metabolic processGO:0008016: regulation of heart contractionGO:0042359: vitamin D metabolic processGO:0055114: oxidation reduction	GO:0004497: monooxygenase activityGO:0005506: iron ion bindingGO:0008392: arachidonic acid epoxygenase activityGO:0009055: electron carrier activityGO:0016491: oxidoreductase activityGO:0016712: oxidoreductase activity, acting on paired donors, with incor
